# Supplementary material for: Trained immunity is induced in humans after immunization with an adenoviral vector COVID-19 vaccine
Source: JCI journal article supplement (doi:10.1172/jci162581), 2022-10-25
Supplement: sd1 [file 1]

301 Moved Permanently

# Moved Permanently

The document has moved here.
